# Supplementary material for: Controlling morphology and phase of pyrite FeS2 hierarchical particles via the combination of structure-direction and chelating agents
Source: Royal Society of Chemistry journal article supplement (doi:10.1039/c2ce25222h), 2012-01-01
Supplement: c2ce25222h.pdf [file c2ce25222h.pdf]

*Supporting Online Material for*

# Controlling Morphology and Phase of Pyrite FeS<sub>2</sub> Hierarchical Particles via the Combination of Structure- direction and Chelating Agents

*Leize Zhu, Beau Richardson, Jessica Tanumihardja, and Qiuming Yu\**

Department of Chemical Engineering

University of Washington, Seattle, WA 98195, USA

Corresponding author:

Qiuming Yu

Department of Chemical Engineering, University of Washington

Seattle, WA 98195, USA

Tel: 01-206-543-4807; Fax: 01-206-685-3451; Email: [qyu@uw.edu](mailto:qyu@uw.edu);

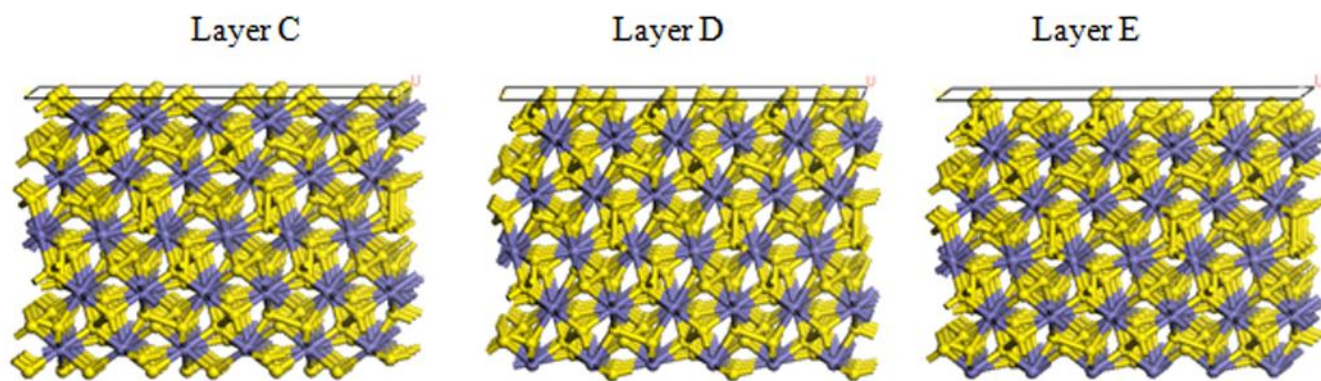

**Fig. S1.** Side-view of (111) surface terminated in layers C, D, and E. Blue balls are iron atoms and yellow balls are sulfur atoms.

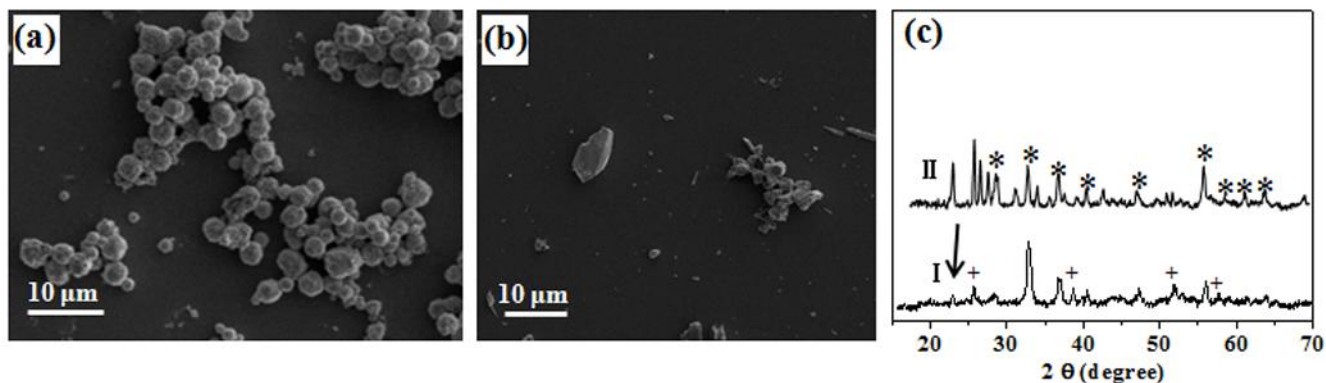

**Fig. S2.** SEM images of the products synthesized in the solutions with the volume ratio of en to water of 0.2 mL/19 mL (a) and 0 mL/19.2 mL (b) without the presence of PVP at 200°C for 24 hr. The XRD patterns of I and II are for the products shown in (a) and (b), respectively. The XRD peaks of marcasite FeS<sub>2</sub> are marked as “+” and pyrite FeS<sub>2</sub> are marked as “\*”. The arrow indicates the peak due to other impurity.
